# Supplementary material for: Effect and Process Evaluation of e-Powered Parents, a Web-Based Support Program for Parents of Children With a Chronic Kidney Disease: Feasibility Randomized Controlled Trial
Source: PubMed Central journal article supplement (PMC6094085; doi:10.2196/jmir.9547), 2018-08-01
Supplement: jmir_v20i8e245_app1.pdf [file jmir_v20i8e245_app1.pdf]

**Figure 1. Content of e-Powered Parents**

| Website                                                            | Part                    | Topics                                                                                                                                                                                                                                                        |                         |                                                                                                                                                                                                       |
|--------------------------------------------------------------------|-------------------------|---------------------------------------------------------------------------------------------------------------------------------------------------------------------------------------------------------------------------------------------------------------|-------------------------|-------------------------------------------------------------------------------------------------------------------------------------------------------------------------------------------------------|
| Community                                                          | <i>Information part</i> | <ul style="list-style-type: none"> <li>Information and instructions how <i>e-Powered Parents</i> (community and training platform) works, including an online manual</li> </ul>                                                                               |                         |                                                                                                                                                                                                       |
|                                                                    |                         | <ul style="list-style-type: none"> <li>Organization of pediatric nephrology unit (accessibility and team members)</li> </ul>                                                                                                                                  |                         |                                                                                                                                                                                                       |
|                                                                    |                         | <ul style="list-style-type: none"> <li>Kidneys, kidney diseases and chronic kidney damage</li> </ul>                                                                                                                                                          |                         |                                                                                                                                                                                                       |
|                                                                    |                         | <ul style="list-style-type: none"> <li>Nutrition (e.g. proteins, phosphates, sodium, potassium, water, energy and recipes)</li> </ul>                                                                                                                         |                         |                                                                                                                                                                                                       |
|                                                                    |                         | <ul style="list-style-type: none"> <li>Medication (e.g. blood pressure, iron deficiency, erythropoietin, vitamins, potassium binders, growth hormone, immune suppressants)</li> </ul>                                                                         |                         |                                                                                                                                                                                                       |
|                                                                    |                         | <ul style="list-style-type: none"> <li>Hemodialysis (e.g. shunt and dialysis catheter) and peritoneal dialysis (e.g. catheter, infections, continuous ambulatory peritoneal dialysis)</li> </ul>                                                              |                         |                                                                                                                                                                                                       |
|                                                                    |                         | <ul style="list-style-type: none"> <li>Kidney transplantation (e.g. blood types and compatibility, rejection of transplant, living donor, screening and preparation, during and after)</li> </ul>                                                             |                         |                                                                                                                                                                                                       |
|                                                                    |                         | <ul style="list-style-type: none"> <li>Growing up with chronic kidney disease (e.g. transition from a pediatric nephrologist to an adult nephrologist)</li> </ul>                                                                                             |                         |                                                                                                                                                                                                       |
|                                                                    |                         | <ul style="list-style-type: none"> <li>Education, school, and children's hospital school</li> </ul>                                                                                                                                                           |                         |                                                                                                                                                                                                       |
|                                                                    |                         | <ul style="list-style-type: none"> <li>Finance, laws, and regulations</li> </ul>                                                                                                                                                                              |                         |                                                                                                                                                                                                       |
|                                                                    |                         | <ul style="list-style-type: none"> <li>Sport</li> </ul>                                                                                                                                                                                                       |                         |                                                                                                                                                                                                       |
|                                                                    |                         | <ul style="list-style-type: none"> <li>Scientific research, projects, and guidelines</li> </ul>                                                                                                                                                               |                         |                                                                                                                                                                                                       |
|                                                                    |                         |                                                                                                                                                                                                                                                               | <i>Interaction part</i> | <ul style="list-style-type: none"> <li>Blog</li> </ul>                                                                                                                                                |
|                                                                    |                         |                                                                                                                                                                                                                                                               |                         | <ul style="list-style-type: none"> <li>Forum (with items such as nutrition, medication, dialysis, transplantation, kidney diseases, school and education, holidays, finance and insurance)</li> </ul> |
| <ul style="list-style-type: none"> <li>Chat</li> </ul>             |                         |                                                                                                                                                                                                                                                               |                         |                                                                                                                                                                                                       |
| <ul style="list-style-type: none"> <li>Private messages</li> </ul> |                         |                                                                                                                                                                                                                                                               |                         |                                                                                                                                                                                                       |
| Training platform                                                  | <i>Training modules</i> | <ul style="list-style-type: none"> <li>Welcome</li> </ul>                                                                                                                                                                                                     |                         |                                                                                                                                                                                                       |
|                                                                    |                         | Stress management module <ul style="list-style-type: none"> <li>Welcome</li> <li>Symptoms of stress</li> <li>Coping with stress</li> <li>Creating a personal stress management plan</li> </ul>                                                                |                         |                                                                                                                                                                                                       |
|                                                                    |                         | Setting limits module <ul style="list-style-type: none"> <li>Welcome</li> <li>Why saying no is important</li> <li>How to say no</li> <li>Handing over care</li> </ul>                                                                                         |                         |                                                                                                                                                                                                       |
|                                                                    |                         | Communication module <ul style="list-style-type: none"> <li>Welcome</li> <li>Active listening</li> <li>Asking questions</li> <li>Being assertive</li> <li>Communication in practice (healthcare professional, child, and other children in family)</li> </ul> |                         |                                                                                                                                                                                                       |
|                                                                    |                         | Coping with your child's CKD module <ul style="list-style-type: none"> <li>Coping</li> <li>Tips that could help you coping with your grief</li> </ul>                                                                                                         |                         |                                                                                                                                                                                                       |
