# Supplementary material for: Effect and Process Evaluation of e-Powered Parents, a Web-Based Support Program for Parents of Children With a Chronic Kidney Disease: Feasibility Randomized Controlled Trial
Source: PubMed Central journal article supplement (PMC6094085; doi:10.2196/jmir.9547), 2018-08-01
Supplement: jmir_v20i8e245_app2.pdf [file jmir_v20i8e245_app2.pdf]

| Scale       | Subscale                        | Floor or ceiling effects | TO                  | TO        | T1        | T1       | T2        | T2       |        |
|-------------|---------------------------------|--------------------------|---------------------|-----------|-----------|----------|-----------|----------|--------|
|             |                                 |                          | Group1              | Group 2   | Group 1   | Group 2  | Group 1   | Group 2  |        |
| <b>CVS</b>  |                                 | Floor (0); n (%)         | 2 (2,8)             | 1 (1,5)   | 1 (2,6)   | 3 (5,8)  | 1 (3,1)   | 2 (10)   |        |
|             |                                 | Ceiling (24); n (%)      | 0 (0)               | 0 (0)     | 0 (0)     | 0 (0)    | 0 (0)     | 0 (0)    |        |
| <b>PIP</b>  | Total score<br>Frequency        | Floor (42); n (%)        | 0 (0)               | 0 (0)     | 0 (0)     | 1 (1,9)  | 0 (0)     | 0 (0)    |        |
|             |                                 | Ceiling (210); n (%)     | 0 (0)               | 0 (0)     | 0 (0)     | 0 (0)    | 0 (0)     | 0 (0)    |        |
|             | Total score<br>Difficulty       | Floor (42); n (%)        | 0 (0)               | 1 (1,5)   | 0 (0)     | 2 (3,8)  | 1 (3,1)   | 0 (0)    |        |
|             |                                 | Ceiling (210); n (%)     | 0 (0)               | 0 (0)     | 0 (0)     | 0 (0)    | 0 (0)     | 0 (0)    |        |
| <b>MFI</b>  | General fatigue                 | Floor (4); n (%)         | 1 (1,5)             | 1 (1,5)   | 1 (2,9)   | 1 (2,0)  | 1 (3,2)   | 2 (10)   |        |
|             |                                 | Ceiling (20); n (%)      | 0 (0)               | 1 (1,5)   | 0 (0)     | 0 (0)    | 0 (0)     | 1 (5)    |        |
|             | Physical fatigue                | Floor (4); n (%)         | 3 (4,4)             | 4 (6,2)   | 2 (5,7)   | 3 (5,9)  | 2 (6,5)   | 3 (15)   |        |
|             |                                 | Ceiling (20); n (%)      | 0 (0)               | 0 (0)     | 0 (0)     | 0 (0)    | 0 (0)     | 0 (0)    |        |
|             | Mental fatigue                  | Floor (4); n (%)         | 4 (5,9)             | 5 (7,7)   | 2 (5,7)   | 2 (3,9)  | 2 (6,5)   | 2 (10)   |        |
|             |                                 | Ceiling (20); n (%)      | 0 (0)               | 0 (0)     | 0 (0)     | 1 (2,0)  | 0 (0)     | 0 (0)    |        |
|             | Reduction in<br>motivation      | Floor (4); n (%)         | 1 (1,5)             | 3 (4,6)   | 2 (5,7)   | 3 (5,9)  | 1(3,2)    | 2 (10)   |        |
|             |                                 | Ceiling (20); n (%)      | 0 (0)               | 0 (0)     | 0 (0)     | 0 (0)    | 0 (0)     | 0 (0)    |        |
|             | Reduction in activity           | Floor (4); n (%)         | 3 (4,4)             | 6 (9,2)   | 3 (8,6)   | 1 (2,0)  | 3 (9,7)   | 3 (15)   |        |
|             |                                 | Ceiling (20); n (%)      | 0 (0)               | 0 (0)     | 0 (0)     | 1 (2,0)  | 0 (0)     | 0 (0)    |        |
|             | <b>Peppi</b>                    |                          | Floor (5); n (%)    | 0 (0)     | 0 (0)     | 0 (0)    | 0 (0)     | 0 (0)    | 0 (0)  |
|             |                                 |                          | Ceiling (25); n (%) | 13 (19,1) | 14 (21,5) | 5 (14,3) | 14 (27,5) | 6 (19,4) | 5 (25) |
| <b>FaMM</b> | Child's daily care              | Floor (5); n (%)         | 0 (0)               | 0 (0)     | 0 (0)     | 0 (0)    | 0 (0)     | 0 (0)    |        |
|             |                                 | Ceiling (25); n (%)      | 3 (4,2)             | 3 (4,5)   | 3 (7,9)   | 2 (3,8)  | 1 (3,1)   | 2 (10)   |        |
|             | Condition<br>management ability | Floor (12); n (%)        | 0 (0)               | 0 (0)     | 0 (0)     | 0 (0)    | 0 (0)     | 0 (0)    |        |
|             |                                 | Ceiling (60); n (%)      | 0 (0)               | 0 (0)     | 0 (0)     | 0 (0)    | 0 (0)     | 0 (0)    |        |
|             | Condition<br>management effort  | Floor (4); n (%)         | 0 (0)               | 1 (1,5)   | 0 (0)     | 1 (1,9)  | 0 (0)     | 0 (0)    |        |
|             |                                 | Ceiling (20); n (%)      | 0 (0)               | 1 (1,5)   | 0 (0)     | 2 (3,8)  | 1 (3,1)   | 0 (0)    |        |
|             | Family life difficulty          | Floor (14); n (%)        | 0 (0)               | 1 (1,5)   | 0 (0)     | 2 (3,8)  | 0 (0)     | 0 (0)    |        |
|             |                                 | Ceiling (70); n (%)      | 0 (0)               | 0 (0)     | 0 (0)     | 0 (0)    | 0 (0)     | 0 (0)    |        |
|             | View on condition<br>impact     | Floor (10); n (%)        | 0 (0)               | 0 (0)     | 0 (0)     | 0 (0)    | 0 (0)     | 0 (0)    |        |
|             |                                 | Ceiling (50); n (%)      | 0 (0)               | 0 (0)     | 0 (0)     | 0 (0)    | 0 (0)     | 0 (0)    |        |
|             | Parental mutuality              | Floor (8); n (%)         | 0 (0)               | 0 (0)     | 0 (0)     | 0 (0)    | 0 (0)     | 0 (0)    |        |
|             |                                 | Ceiling (40); n (%)      | 1 (1,5)             | 2 (3,0)   | 1 (2,6)   | 2 (3,8)  | 2 (6,3)   | 0 (0)    |        |
