# Supplementary material for: Effect and Process Evaluation of e-Powered Parents, a Web-Based Support Program for Parents of Children With a Chronic Kidney Disease: Feasibility Randomized Controlled Trial
Source: PubMed Central journal article supplement (PMC6094085; doi:10.2196/jmir.9547), 2018-08-01
Supplement: jmir_v20i8e245_app3.pdf [file jmir_v20i8e245_app3.pdf]

| Scale | Subscale                     | Time of measurement | Group 1 (%) | Group 2 (%) | Total (%) |      |
|-------|------------------------------|---------------------|-------------|-------------|-----------|------|
| CVS   |                              | T0-T1               | 9.7         | 10.6        | 10.1      |      |
|       |                              | T0-T2               | 4.2         | 9.1         | 6.5       |      |
| PIP   | Total score frequency        | T0-T1               | 2.8         | 3.0         | 2.9       |      |
|       |                              | T0-T2               | 2.8         | 1.5         | 2.2       |      |
|       | Total score difficulty       | T0-T1               | 1.4         | 1.5         | 1.4       |      |
|       |                              | T0-T2               | 0.0         | 0.0         | 0.0       |      |
| MFI   | General fatigue              | T0-T1               | 6.9         | 12.1        | 9.4       |      |
|       |                              | T0-T2               | 11.1        | 7.6         | 9.4       |      |
|       | Physical fatigue             | T0-T1               | 8.3         | 9.1         | 8.7       |      |
|       |                              | T0-T2               | 8.3         | 4.5         | 6.5       |      |
|       | Mental fatigue               | T0-T1               | 12.5        | 9.1         | 10.9      |      |
|       |                              | T0-T2               | 12.5        | 7.6         | 10.1      |      |
|       | Reduction in motivation      | T0-T1               | 13.9        | 16.7        | 15.2      |      |
|       |                              | T0-T2               | 11.1        | 4.5         | 8.0       |      |
|       | Reduction in activity        | T0-T1               | 12.5        | 6.1         | 9.4       |      |
|       |                              | T0-T2               | 8.3         | 4.5         | 6.5       |      |
|       | PEPPI                        |                     | T0-T1       | 33.3        | 48.5      | 40.6 |
|       |                              |                     | T0-T2       | 30.6        | 19.7      | 25.4 |
| FaMM  | Child's daily care           | T0-T1               | 9.7         | 16.7        | 13.0      |      |
|       |                              | T0-T2               | 5.6         | 4.5         | 5.1       |      |
|       | Condition management ability | T0-T1               | 5.6         | 12.1        | 8.7       |      |
|       |                              | T0-T2               | 5.6         | 4.5         | 5.1       |      |
|       | Condition management effort  | T0-T1               | 4.2         | 10.6        | 7.2       |      |
|       |                              | T0-T2               | 8.3         | 7.6         | 8.0       |      |
|       | Family life difficulty       | T0-T1               | 2.8         | 12.1        | 7.2       |      |
|       |                              | T0-T2               | 2.8         | 1.5         | 2.2       |      |
|       | View on condition impact     | T0-T1               | 6.9         | 9.1         | 8.0       |      |
|       |                              | T0-T2               | 1.4         | 3.0         | 2.2       |      |
|       | Parental mutuality           | T0-T1               | 12.5        | 9.1         | 10.9      |      |
|       |                              | T0-T2               | 5.6         | 7.6         | 6.5       |      |
