# Supplementary material for: Effect and Process Evaluation of e-Powered Parents, a Web-Based Support Program for Parents of Children With a Chronic Kidney Disease: Feasibility Randomized Controlled Trial
Source: PubMed Central journal article supplement (PMC6094085; doi:10.2196/jmir.9547), 2018-08-01
Supplement: jmir_v20i8e245_app4.pdf [file jmir_v20i8e245_app4.pdf]

|       |                              | Intention to treat<br>T0-T1 |                     |         | Intention to treat<br>T0-T2 |                     |         |
|-------|------------------------------|-----------------------------|---------------------|---------|-----------------------------|---------------------|---------|
| Scale | Subscales                    | SES <sup>1</sup>            | 95% CI <sup>2</sup> | p-Value | SES <sup>1</sup>            | 95% CI <sup>2</sup> | p-Value |
| CVS   |                              | -.19                        | -2.16 to 0.54       | .24     | -.21                        | -2.13 to 0.39       | .17     |
| PIP   | Frequency                    | -.22                        | -13.51 to 3.07      | .22     | -.15                        | -11.71 to 4.36      | .37     |
|       | Difficulty                   | .00                         | -9.68 to 9.42       | .98     | .07                         | -7.15 to 10.80      | .69     |
| MFI   | General fatigue              | .02                         | -0.94 to 1.10       | .88     | -.03                        | -1.14 to 0.95       | .86     |
|       | Physical fatigue             | .12                         | -0.61 to 1.38       | .44     | .08                         | -0.74 to 1.25       | .61     |
|       | Mental fatigue               | -.11                        | -1.60 to 0.85       | .55     | -.15                        | -1.63 to 0.61       | .37     |
|       | Reduced motivation           | .05                         | -0.90 to 1.20       | .78     | .04                         | -0.90 to 1.10       | .85     |
|       | Reduced activity             | -.02                        | -1.09 to 1.00       | .93     | -.08                        | -1.24 to 0.76       | .64     |
| PEPPI |                              | -.11                        | -1.20 to 0.60       | .51     | -.06                        | -1.05 to 0.74       | .74     |
| FaMM  | Child's daily life           | -.07                        | -1.57 to 0.95       | .63     | -.02                        | -1.29 to 1.10       | .88     |
|       | Condition management ability | -.19                        | -2.23 to 0.66       | .29     | -.16                        | -2.14 to 0.82       | .38     |
|       | Condition management effort  | -.02                        | -1.18 to 1.02       | .89     | -.10                        | -1.35 to 0.64       | .48     |
|       | Family life difficulty       | -.03                        | -3.00 to 2.37       | .82     | -.02                        | -2.96 to 2.21       | .78     |
|       | Parental mutuality           | .15                         | -0.88 to 2.11       | .42     | .12                         | -1.01 to 1.99       | .52     |
|       | View on condition impact     | -.01                        | -1.62 to 1.57       | .97     | -.05                        | -1.76 to 1.25       | .74     |

<sup>1</sup>SES: Standardized effect size, <sup>2</sup>CI: Confidence Interval
